# Supplementary material for: Collision cross section predictions using 2-dimensional molecular descriptors
Source: Royal Society of Chemistry journal article supplement (doi:10.1039/c7cc04257d), 2017-01-01
Supplement: c7cc04257d1.pdf [file c7cc04257d1.pdf]

**Supporting information for:** Collision Cross Section Predictions using 2-Dimensional  
Molecular Descriptors, by Soper-Hopper *et al.*

Corresponding author: Facundo M. Fernandez

E-mail: [facundo.fernandez@chemistry.gatech.edu](mailto:facundo.fernandez@chemistry.gatech.edu)

Ph: 404 385 4432

Fax: 404 385 6447

## General Workflow.

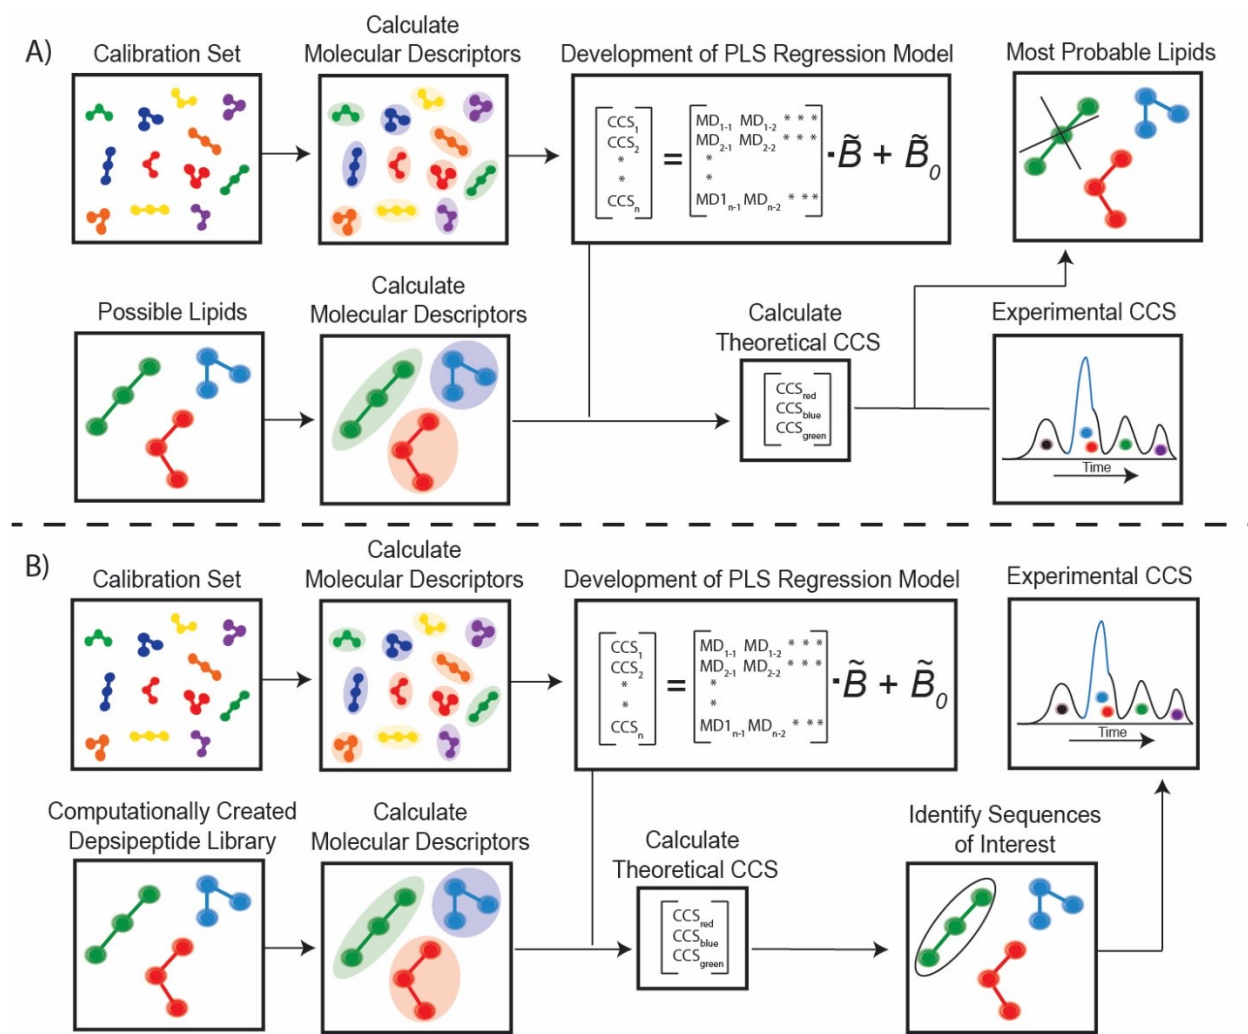

Collision cross section prediction can be applied to many areas of research. Highlighted here are two such applications. In A) the molecular descriptors for a calibration set of lipids with known CCS are used to develop a PLS regression model. The PLS model can then be used to calculate the theoretical CCS of a pool of new lipids which have been selected by MS and MS/MS. The theoretical CCS value is compared to the experimentally measured CCS to narrow down the pool of potential lipids for a more accurate identification. In the other scenario, B), a calibration set made up of pure amino acid chains and pure hydroxy acid chains are used in the development of the PLS regression model. This model is then applied to a library of depsipeptides composed of the amino acids and hydroxy acids used in the calibration. This library is built computationally and consists of all possible combinations of monomeric units, up to a specified chain length. Theoretical CCS values are compared to one another to identify sequences which deviate significantly from the norm. These sequences can then be subjected to experiments such as IM-MS, circular dichroism, NMR, microscopy, and other structural biology techniques.

## Lipid CCS prediction model development.

The accompanying spread sheet details the calibration and validation sets for the lipid model development. Collision cross section (CCS) values were taken from the Astarita *et. al.* database<sup>1</sup>. General classes of lipids used are shown below.

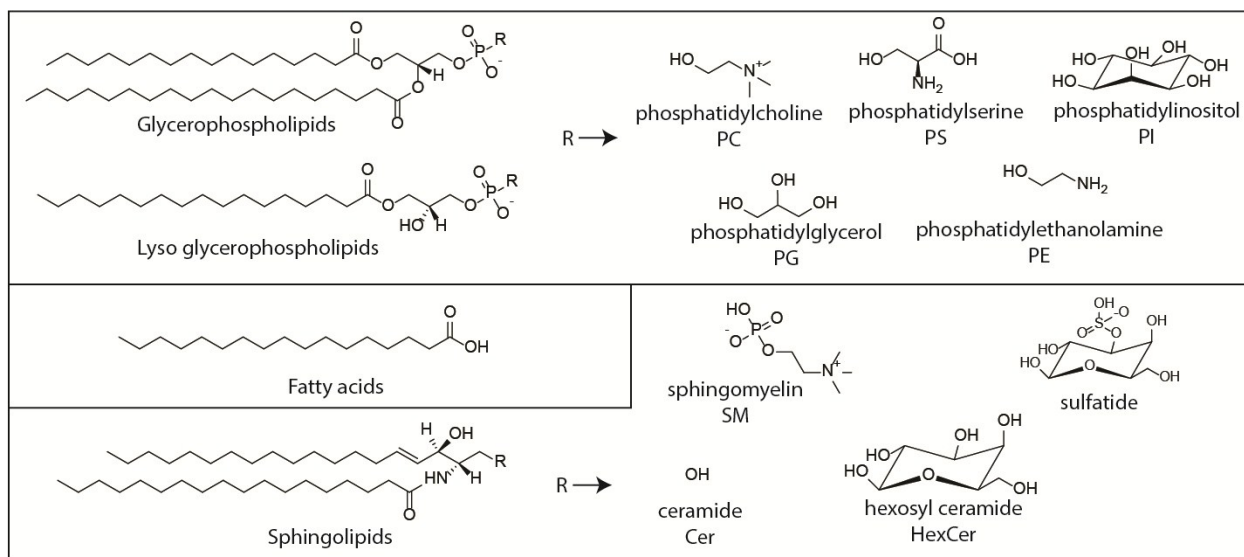

Results of PLS model using all molecular descriptors (excluding 3D descriptors) for lipids are detailed below.

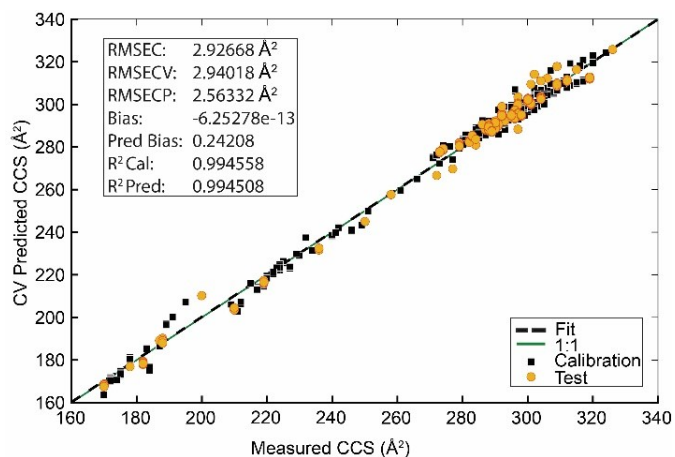

Genetic algorithms and reverse iPLS were used to reduce the total number of molecular descriptors from 3827 to 68. Genetic algorithms with population sizes of 124-256, a window width of 1, and penalty slope of 0.01 were tested. A maximum of 25 variables (descriptors) was targeted over a maximum of 200 generations with 50% variable overlap at convergence, and a mutation rate of 0.003-0.007 (double crossover). Random block cross validation was employed on 5 splits and 5 iterations. The overall GA runs were replicated 3 times. The table below details the parameters used for each GA and the total number of selected molecular descriptors in each GA. The selected molecular descriptors were

pooled, and further reduced by reverse iPLS. Unless specified the parameters in the table are the same as Set A.

| Parameters         | Set A  | Set B | Set C | Set D |
|--------------------|--------|-------|-------|-------|
| Population Size    | 124    | 256   | 256   | 256   |
| Window Width       | 1      |       |       |       |
| % Initial Terms    | 10     |       |       |       |
| Target Max         | 25     |       |       |       |
| Penalty Slope      | 0.01   |       |       |       |
| Max Generations    | 200    |       |       |       |
| % at Convergence   | 50     |       |       |       |
| Mutation Rate      | 0.005  |       | 0.007 | 0.003 |
| Crossover          | double |       |       |       |
| Regression         | PLS    |       |       |       |
| # of LVs           | 5      |       |       |       |
| Cross-Validation   | Random |       |       |       |
| # of Splits        | 5      |       |       |       |
| # of Iterations    | 5      |       |       |       |
| Replicate Runs     | 3      |       |       |       |
| Variables Selected | 27     | 25    | 26    | 30    |

The final molecular descriptors selected for lipid CCS prediction are listed below with their variable importance in projection (VIP) score. The higher the score, the more influential the molecular descriptor is to the final model. A VIP score close to or greater than one indicates the a variable important to the model. The molecular descriptor with the highest VIP score was Information Index on Molecular Size (ISIZ). Each molecular descriptor belongs to a class of descriptor. The descriptors with highest VIP scores typically fall into 4 main categories: information indices, 2D-Matrix based descriptors, burden eigenvalues, and topological indices.

| Name                | Description                                                                                                       | VIP Score |
|---------------------|-------------------------------------------------------------------------------------------------------------------|-----------|
| <b>ISIZ</b>         | information index on molecular size                                                                               | 1.707809  |
| <b>Ho_Dz(Z)</b>     | Hosoya-like index (log function) from Barysz matrix weighted by atomic number                                     | 1.683778  |
| <b>SpMax_D/Dt</b>   | leading eigenvalue from distance/detour matrix                                                                    | 1.678203  |
| <b>Ho_D</b>         | Hosoya-like index (log function) from topological distance matrix                                                 | 1.670958  |
| <b>SpDiam_Dz(e)</b> | spectral diameter from Barysz matrix weighted by Sanderson electronegativity                                      | 1.657083  |
| <b>SpMin6_Bh(i)</b> | smallest eigenvalue n. 6 of Burden matrix weighted by ionization potential                                        | 1.640293  |
| <b>SpMin5_Bh(i)</b> | smallest eigenvalue n. 5 of Burden matrix weighted by ionization potential                                        | 1.639537  |
| <b>Wi_D/Dt</b>      | Wiener-like index from distance/detour matrix                                                                     | 1.632239  |
| <b>VE2_Dz(v)</b>    | average coefficient of the last eigenvector (absolute values) from Barysz matrix weighted by van der Waals volume | 1.631325  |

|                      |                                                                                                                   |          |
|----------------------|-------------------------------------------------------------------------------------------------------------------|----------|
| <b>VE2_D</b>         | average coefficient of the last eigenvector (absolute values) from topological distance matrix                    | 1.629118 |
| <b>BAC</b>           | Balaban centric index                                                                                             | 1.628818 |
| <b>VE2_Dz(i)</b>     | average coefficient of the last eigenvector (absolute values) from Barysz matrix weighted by ionization potential | 1.624038 |
| <b>SpMAD_D/Dt</b>    | spectral mean absolute deviation from distance/detour matrix                                                      | 1.600553 |
| <b>IDET</b>          | total information content on the distance equality                                                                | 1.595744 |
| <b>ATS3m</b>         | Broto-Moreau autocorrelation of lag 3 (log function) weighted by mass                                             | 1.586922 |
| <b>Eig12_AEA(dm)</b> | eigenvalue n. 12 from augmented edge adjacency mat. weighted by dipole moment                                     | 1.585274 |
| <b>Wi_Dz(i)</b>      | Wiener-like index from Barysz matrix weighted by ionization potential                                             | 1.580123 |
| <b>Wi_Dz(p)</b>      | Wiener-like index from Barysz matrix weighted by polarizability                                                   | 1.572199 |
| <b>QW_L</b>          | quasi-Wiener index (Kirchhoff number) from Laplace matrix                                                         | 1.562315 |
| <b>SMTI</b>          | Schultz Molecular Topological Index (MTI)                                                                         | 1.546356 |
| <b>SM06_AEA(bo)</b>  | spectral moment of order 6 from augmented edge adjacency mat. weighted by bond order                              | 1.541396 |
| <b>GMTI</b>          | Gutman Molecular Topological Index                                                                                | 1.534685 |
| <b>Eig06_EA(ri)</b>  | eigenvalue n. 6 from edge adjacency mat. weighted by resonance integral                                           | 1.528521 |
| <b>IDMT</b>          | total information content on the distance magnitude                                                               | 1.527572 |
| <b>H_D/Dt</b>        | Harary-like index from distance/detour matrix                                                                     | 1.521057 |
| <b>CENT</b>          | centralization                                                                                                    | 1.520379 |
| <b>SM07_AEA(bo)</b>  | spectral moment of order 7 from augmented edge adjacency mat. weighted by bond order                              | 1.517004 |
| <b>SM03_EA(ed)</b>   | spectral moment of order 3 from edge adjacency mat. weighted by edge degree                                       | 1.453774 |
| <b>nCsp3</b>         | number of sp3 hybridized Carbon atoms                                                                             | 1.444398 |
| <b>SM09_EA(ed)</b>   | spectral moment of order 9 from edge adjacency mat. weighted by edge degree                                       | 1.416581 |
| <b>SpMax3_Bh(v)</b>  | largest eigenvalue n. 3 of Burden matrix weighted by van der Waals volume                                         | 1.414511 |
| <b>SM12_EA(ed)</b>   | spectral moment of order 12 from edge adjacency mat. weighted by edge degree                                      | 1.409085 |
| <b>SpMax_L</b>       | leading eigenvalue from Laplace matrix                                                                            | 1.393004 |
| <b>Eig04_AEA(bo)</b> | eigenvalue n. 4 from augmented edge adjacency mat. weighted by bond order                                         | 1.315147 |
| <b>DECC</b>          | eccentric                                                                                                         | 1.31135  |
| <b>Eig04_EA(bo)</b>  | eigenvalue n. 4 from edge adjacency mat. weighted by bond order                                                   | 1.300912 |
| <b>SpMax_B(m)</b>    | leading eigenvalue from Burden matrix weighted by mass                                                            | 1.251246 |
| <b>C-002</b>         | CH2R2                                                                                                             | 1.140123 |
| <b>ALOGP</b>         | Ghose-Crippen octanol-water partition coeff. (logP)                                                               | 1.053641 |
| <b>GATS2e</b>        | Geary autocorrelation of lag 2 weighted by Sanderson electronegativity                                            | 1.04824  |
| <b>ALOGP2</b>        | squared Ghose-Crippen octanol-water partition coeff. (logP <sup>2</sup> )                                         | 0.991153 |
| <b>P_VSA_s_1</b>     | P_VSA-like on I-state, bin 1                                                                                      | 0.925566 |
| <b>P_VSA_p_4</b>     | P_VSA-like on polarizability, bin 4                                                                               | 0.902342 |
| <b>JGI8</b>          | mean topological charge index of order 8                                                                          | 0.710091 |

|                     |                                                                          |          |
|---------------------|--------------------------------------------------------------------------|----------|
| <b>SpMax5_Bh(s)</b> | largest eigenvalue n. 5 of Burden matrix weighted by I-state             | 0.548636 |
| <b>P_VSA_LogP_4</b> | P_VSA-like on LogP, bin 4                                                | 0.510328 |
| <b>PW4</b>          | path/walk 4 - Randic shape index                                         | 0.46771  |
| <b>IC3</b>          | Information Content index (neighborhood symmetry of 3-order)             | 0.388996 |
| <b>Eig03_EA(dm)</b> | eigenvalue n. 3 from edge adjacency mat. weighted by dipole moment       | 0.369221 |
| <b>CATS2D_00_AN</b> | CATS2D Acceptor-Negative at lag 00                                       | 0.229799 |
| <b>CATS2D_05_DL</b> | CATS2D Donor-Lipophilic at lag 05                                        | 0.224391 |
| <b>MATS7m</b>       | Moran autocorrelation of lag 7 weighted by mass                          | 0.219895 |
| <b>MCD</b>          | molecular cyclized degree                                                | 0.18916  |
| <b>Chi_D/Dt</b>     | Randic-like index from distance/detour matrix                            | 0.185162 |
| <b>WiA_D/Dt</b>     | average Wiener-like index from distance/detour matrix                    | 0.185036 |
| <b>Eig08_EA(dm)</b> | eigenvalue n. 8 from edge adjacency mat. weighted by dipole moment       | 0.13586  |
| <b>MATS6p</b>       | Moran autocorrelation of lag 6 weighted by polarizability                | 0.107775 |
| <b>NssNH</b>        | Number of atoms of type ssNH                                             | 0.098605 |
| <b>B04[C-N]</b>     | Presence/absence of C - N at topological distance 4                      | 0.098605 |
| <b>SIC2</b>         | Structural Information Content index (neighborhood symmetry of 2-order)  | 0.0898   |
| <b>B02[O-O]</b>     | Presence/absence of O - O at topological distance 2                      | 0.082945 |
| <b>Eig09_EA(dm)</b> | eigenvalue n. 9 from edge adjacency mat. weighted by dipole moment       | 0.063465 |
| <b>N-066</b>        | AI-NH2                                                                   | 0.057733 |
| <b>SsNH2</b>        | Sum of sNH2 E-states                                                     | 0.057132 |
| <b>VE1sign_D/Dt</b> | coefficient sum of the last eigenvector from distance/detour matrix      | 0.038758 |
| <b>nOHp</b>         | number of primary alcohols                                               | 0.021518 |
| <b>VE1sign_D</b>    | coefficient sum of the last eigenvector from topological distance matrix | 0.005006 |
| <b>SRW03</b>        | self-returning walk count of order 3                                     | 0        |

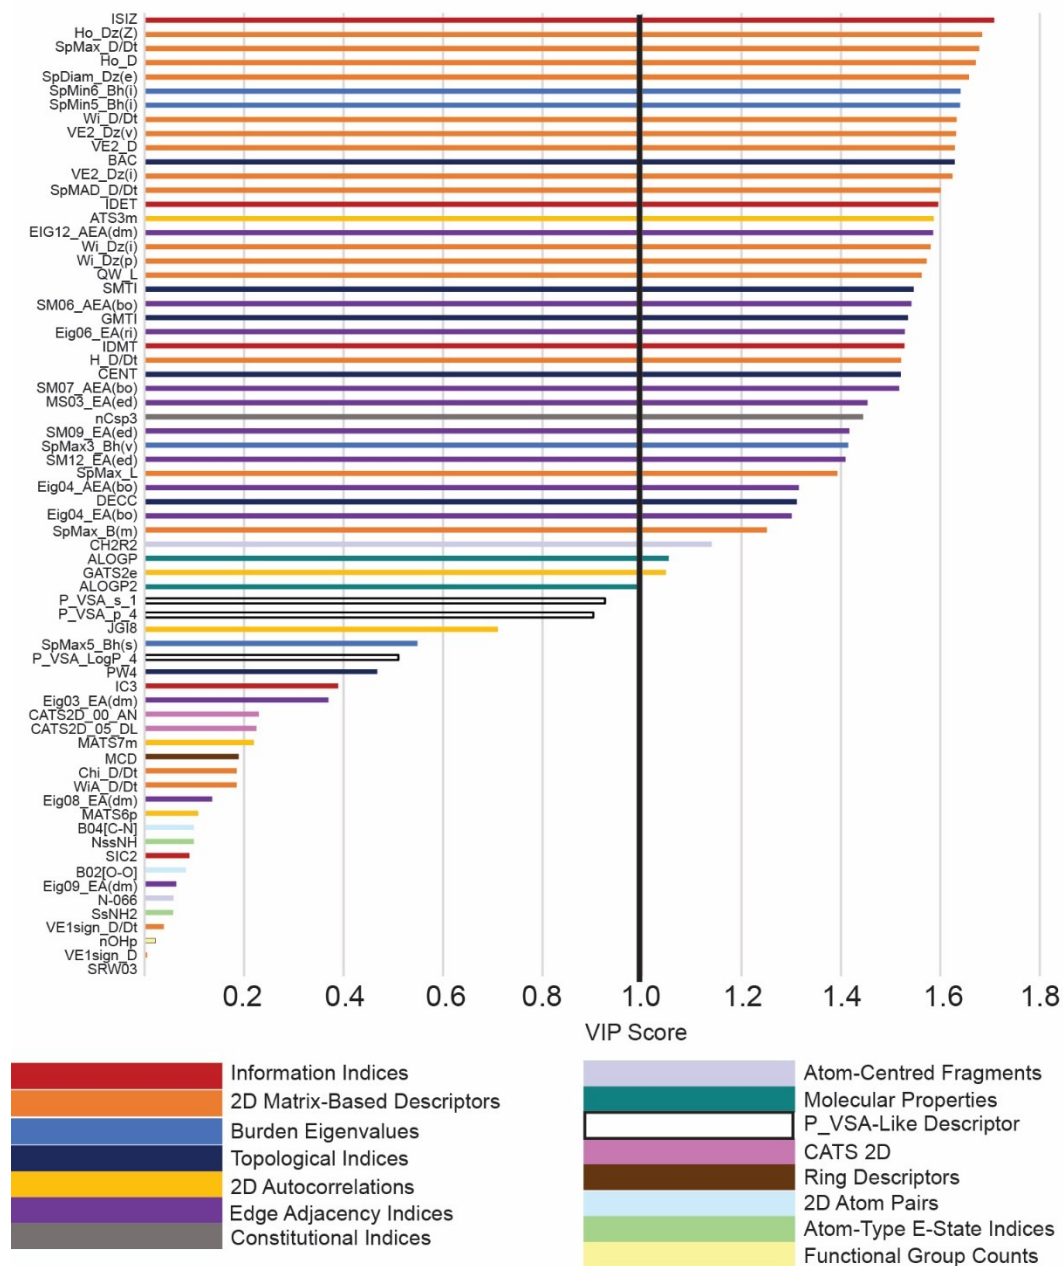

### Depsipeptide CCS Prediction

Depsipeptides contain a mixed hydroxy acid/ amino acid backbone. Shown below is the structure for a representative depsipeptide with lactic acid and a generic amino acid. Hydroxy acids are boxed in red, with the amino acids in blue.

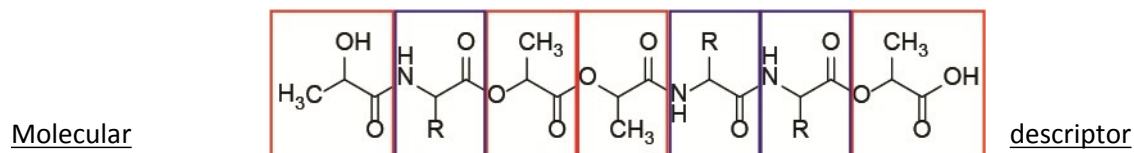

### calculation for depsipeptides.

Sequence of the depsipeptides of a desired length were generated in FASTA file format via permutations of the alphabet of amino and hydroxy acids of a certain type (alanine and lactic acid for this work), where the capital letters represented amino acids and equivalent small letters denoted the corresponding hydroxy acids. The FASTA sequences were then converted to the 3D structure files in mol2 format using an in house modified OpenBabel package. The resulting mol2 files were uploaded into Dragon 7.0. Molecular descriptors were calculated as the same way detailed for the lipids, and excluding all 3D descriptors.

To enable the support for both hydroxy and amino acids, the fastaformat.cpp routine of OpenBabel was modified in two ways. First, a case sensitivity support was added to the code to distinguish between the sets of the amino and hydroxy acids. Second, a new sequence type DepsiSequence containing both hydroxy and amino acid residues was added to the routine. A set of residue record for DepsiResidues was created. The records for the amino acid residues have been copied from the existing ProteinResidues record. The records for the corresponding hydroxy acid residues were generated by editing the records for the amino acid residues and replacing an amide "N" atom with ester "O" and removing the attached hydrogen. The beta strand conformation inherited from the protein residues was retained for all hydroxy acid residues.

Depsipeptide Synthesis. One hundred  $\mu\text{L}$  of the sample solution containing 100 mM of L-lactic acid and 100 mM L-alanine was heated to  $95^{\circ}\text{C}$  by a Bio-Rad MyCycler 96 well thermal cycler. The oligomer mixtures were obtained after 3 days dry down. Both L-lactic acid and L-alanine were from Sigma-Aldrich.

IM-MS Instrumental Methods. Mass spectra were collected on a quadrupole-ion mobility-time-of-flight mass spectrometer (Synapt G2 HDMS, Waters, Milford, MA, USA) with an electrospray ionization source. Depsipeptide ions were generated using direct infusion at a capillary voltage of 2.5kV. The source was operated in negative ion mode with a source temperature of  $80^{\circ}\text{C}$ , the sample cone at 30 V and extraction cone at 3.0 V. The desolvation gas flow was 650 L/Hr, and a desolvation temperature of  $250^{\circ}\text{C}$ . The trap region of the traveling wave IM separator was operated at a wave velocity of 311 m/s, wave height of 6.0 V. The IMS wave velocity was 500 m/s, with a wave height of 40 V. The transfer wave velocity was 190 m/s, with a wave height of 4.0 V. Fragmentation was induced in the transfer region using a transfer collision energy between 10 and 40V. Mass spectra were calibrated using sodium formate and analyzed using MassLynx 4.1 and Driftscope 2.0 software. CCS ( $\Omega$ ) measurements were externally calibrated using the published values for malic acid in nitrogen. Measurements were taken in triplicate. Samples were prepared by rehydrating dried sample in water containing 0.1% formic acid, and analyzed immediately.

MS/MS depsipeptide identification. The quadrupole settings required to achieve a high-enough level of sensitivity for detection did not provide perfect isolation of a single mass. Data shown below shows other species differing by only 1 Da. From previous work, we know that the first residue on the N-terminus of the depsipeptide is a hydroxy acid (for this work, lactic acid). Therefore, we only considered fragments which started with lactic acid. Additionally, we do not typically see b ions in the fragmentation patterns, as the charge carrier is the carboxylic acid at the C-terminus.



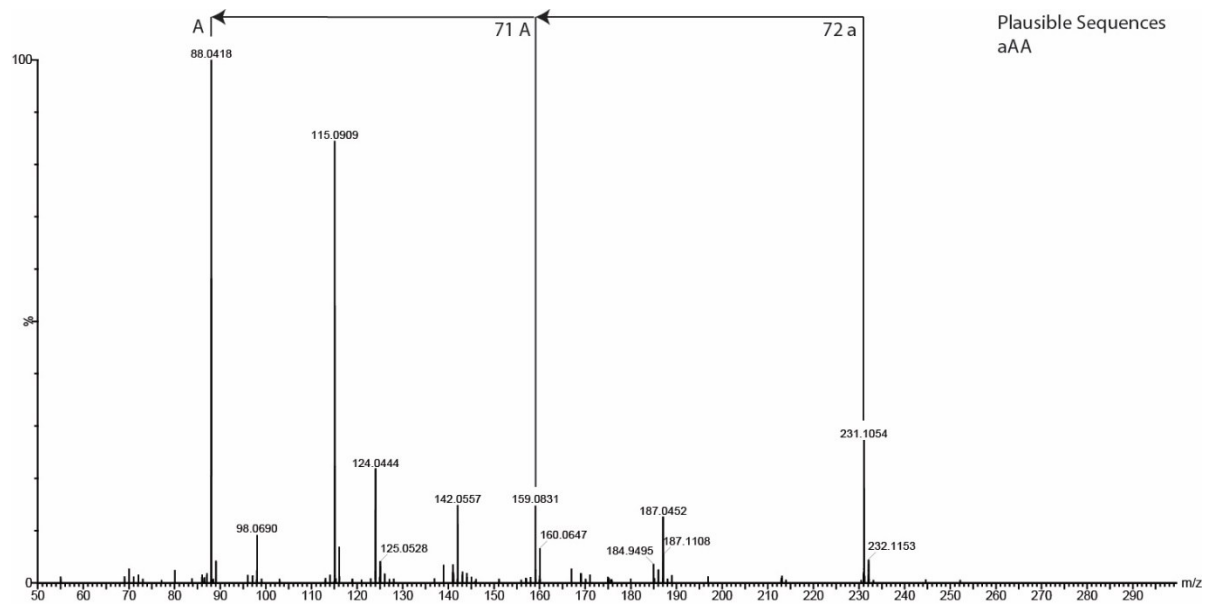

Precursor  $m/z = 231.105$ . Isomers contain 1 lactic acid and 2 alanine.

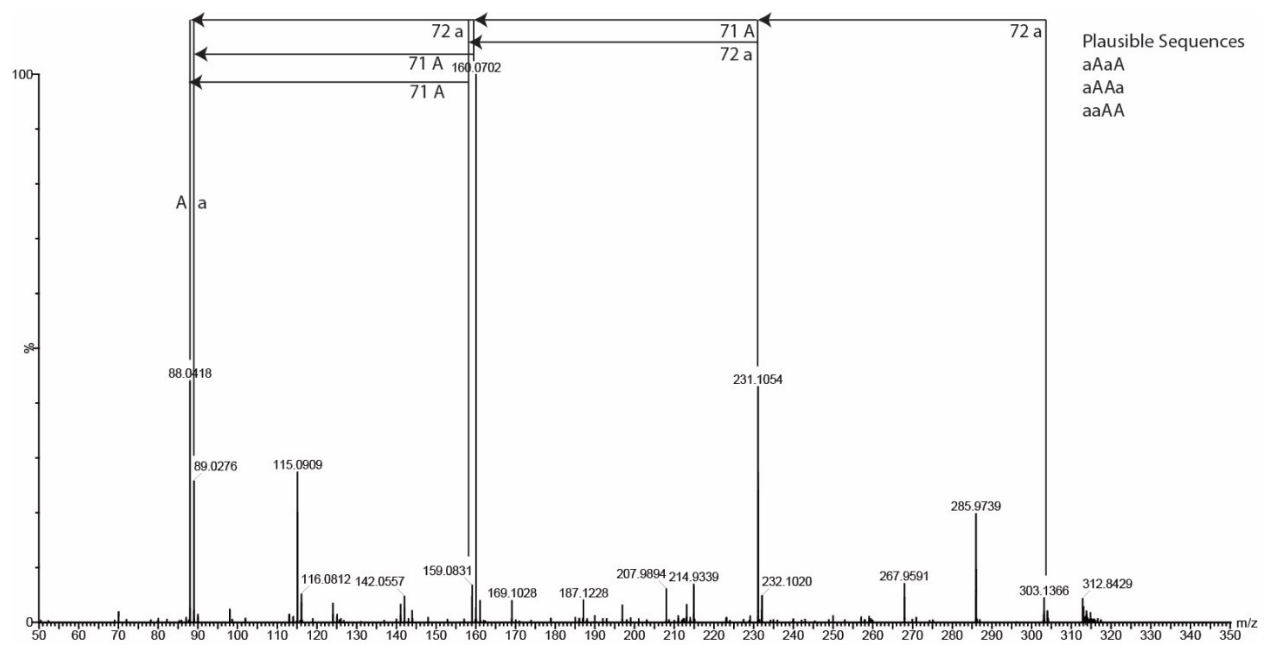

Precursor  $m/z = 303.137$ . Isomers contain 2 lactic acid and 2 alanine.

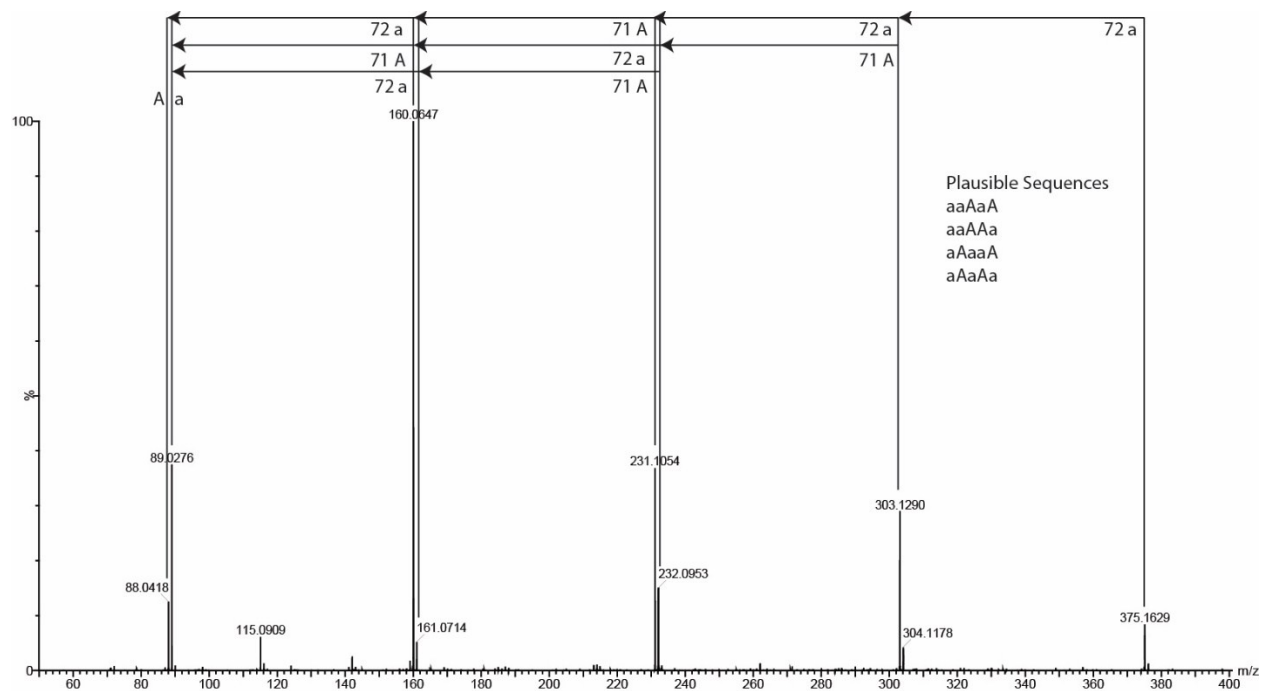

Precursor m/z = 375.163. Isomers contain 3 lactic acid and 2 alanine.

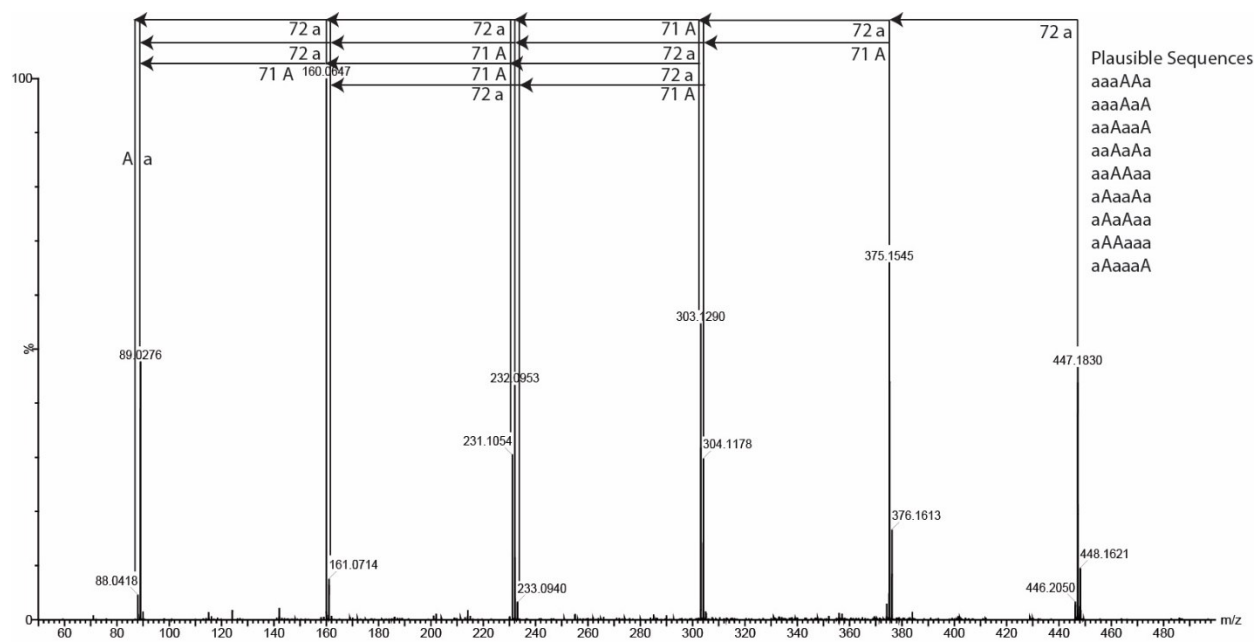

Precursor m/z = 447.183. Isomers contain 4 lactic acid and 2 alanine.

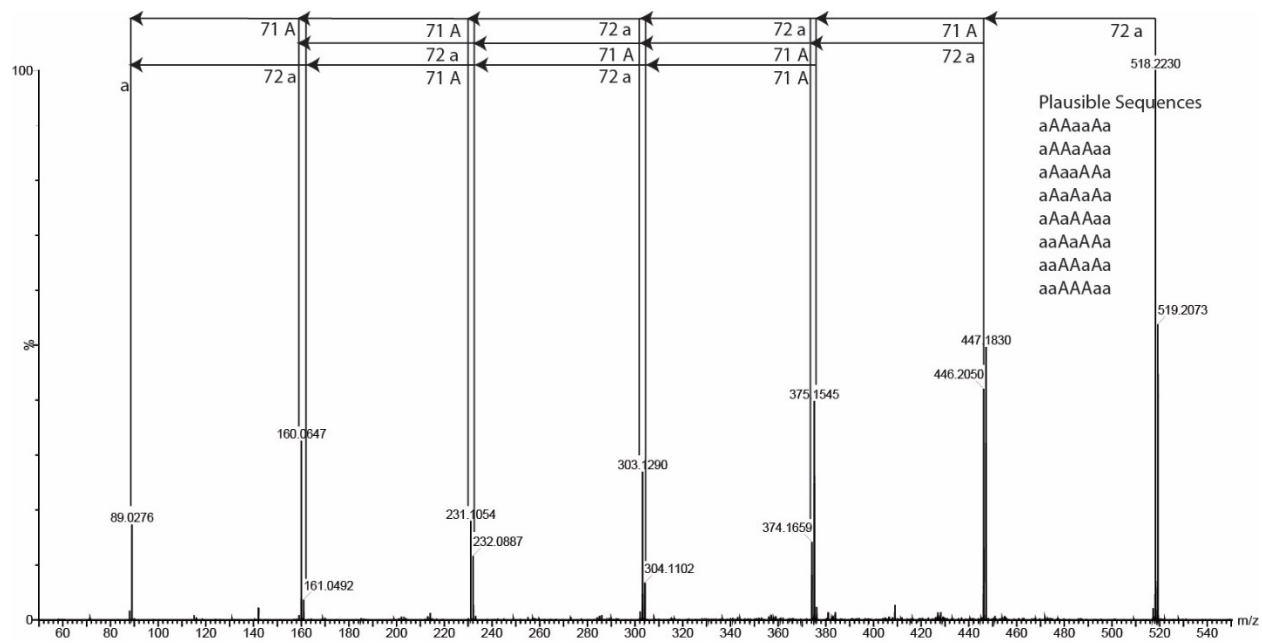

Precursor  $m/z = 518.223$ . Isomers contain 4 lactic acid and 3 alanine.

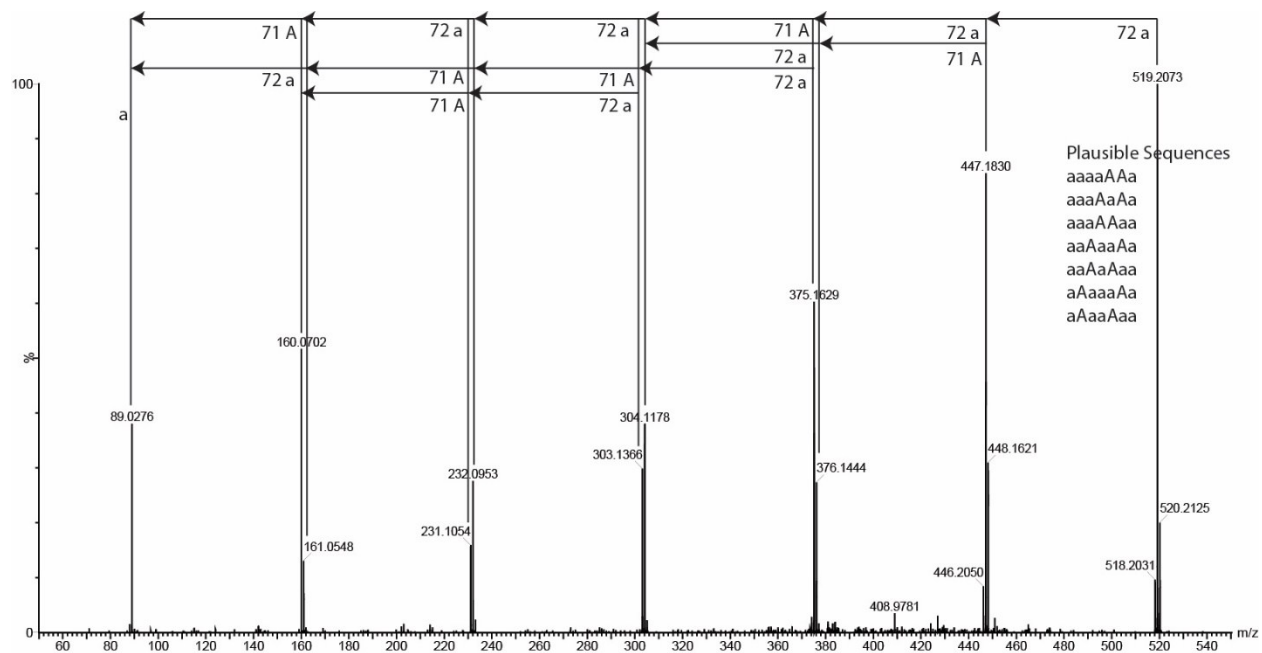

Precursor  $m/z = 519.207$ . Isomers contain 5 lactic acid and 2 alanine.

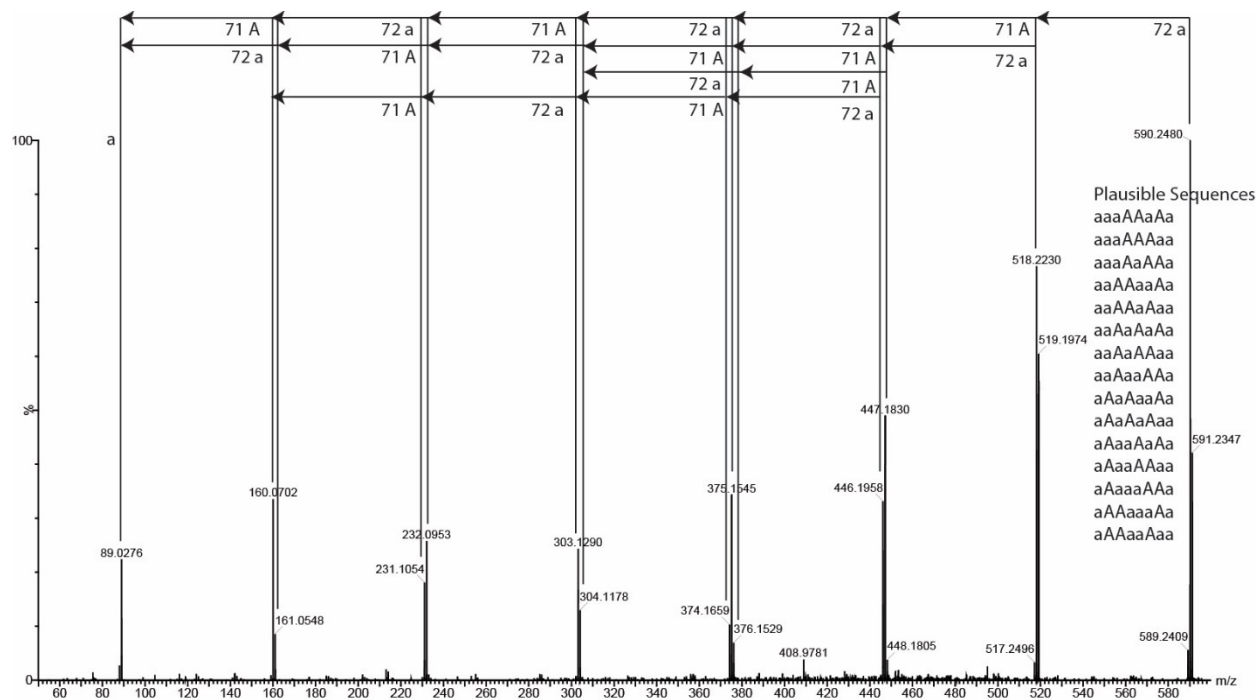

Precursor m/z = 590.248. Isomers contain 5 lactic acid and 3 alanine.

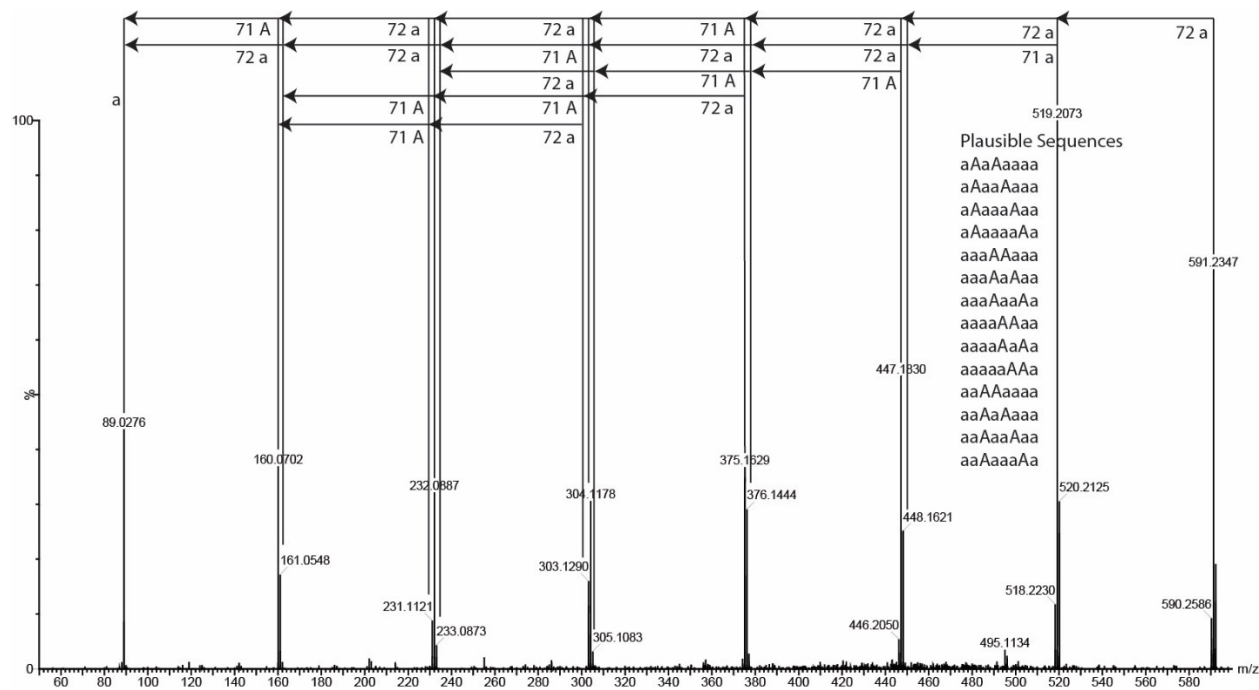

Precursor m/z = 591.235. Isomers contain 6 lactic acid and 2 alanine.



| Sequence | Predicted CCS (Å <sup>2</sup> ) | Measured CCS (Å <sup>2</sup> ) | % Difference |
|----------|---------------------------------|--------------------------------|--------------|
| aAA      | 149.54                          | 150.01                         | -0.32        |
| aAaA     | 165.27                          | 167.23                         | -1.17        |
| aAAa     | 163.45                          | 167.23                         | -2.29        |
| aaAA     | 166.52                          | 167.23                         | -0.42        |
| aaAaA    | 180.19                          | 181.05                         | -0.48        |
| aaAAa    | 179.63                          | 181.05                         | -0.79        |
| aAaaA    | 179.62                          | 181.05                         | -0.79        |
| aAaAa    | 178.94                          | 181.05                         | -1.18        |
| aaaAAa   | 196.89                          | 195.99                         | 0.46         |
| aaaAaA   | 196.98                          | 195.99                         | 0.50         |
| aaAaaA   | 195.93                          | 195.99                         | -0.03        |
| aaAaAa   | 195.87                          | 195.99                         | -0.06        |
| aaAAaa   | 194.62                          | 195.99                         | -0.70        |
| aAaaAa   | 195.75                          | 195.99                         | -0.12        |
| aAaAaa   | 194.57                          | 195.99                         | -0.73        |
| aAAaaa   | 193.43                          | 195.99                         | -1.32        |
| aAaaaA   | 196.08                          | 195.99                         | 0.04         |
| aAAaaAa  | 208.32                          | 210.01                         | -0.81        |
| aAAaAaa  | 207.65                          | 210.01                         | -1.13        |
| aAaaAAa  | 210.20                          | 210.01                         | 0.09         |
| aAaAaAa  | 208.91                          | 210.01                         | -0.53        |
| aAaAAaa  | 208.33                          | 210.01                         | -0.81        |
| aaAaAAa  | 210.08                          | 210.01                         | 0.03         |
| aaAAaAa  | 208.72                          | 210.01                         | -0.62        |
| aaAAAaa  | 208.03                          | 210.01                         | -0.95        |
| aaaaAAa  | 211.27                          | 210.00                         | 0.60         |
| aaaAaAa  | 210.03                          | 210.00                         | 0.01         |
| aaaAAaa  | 209.71                          | 210.00                         | -0.14        |
| aaAaaAa  | 209.58                          | 210.00                         | -0.20        |
| aaAaAaa  | 208.64                          | 210.00                         | -0.65        |
| aAaaaAa  | 209.93                          | 210.00                         | -0.03        |
| aAaaAaa  | 209.39                          | 210.00                         | -0.29        |
| aaaAAaAa | 224.19                          | 223.25                         | 0.42         |
| aaaAAAaa | 224.14                          | 223.25                         | 0.40         |
| aaaAaAAa | 225.19                          | 223.25                         | 0.87         |
| aaAAaaAa | 222.87                          | 223.25                         | -0.17        |
| aaAAaAaa | 222.73                          | 223.25                         | -0.23        |
| aaAaAaAa | 223.90                          | 223.25                         | 0.29         |
| aaAaAAaa | 223.51                          | 223.25                         | 0.12         |
| aaAaaAAa | 224.75                          | 223.25                         | 0.67         |
| aAaAaaAa | 223.90                          | 223.25                         | 0.29         |
| aAaAaAaa | 222.95                          | 223.25                         | -0.13        |

| Sequence   | Predicted CCS (Å <sup>2</sup> ) | Measured CCS (Å <sup>2</sup> ) | % Difference |
|------------|---------------------------------|--------------------------------|--------------|
| aAaaAaAa   | 224.38                          | 223.25                         | 0.50         |
| aAaaAAaa   | 224.13                          | 223.25                         | 0.39         |
| aAaaaAAa   | 225.19                          | 223.25                         | 0.86         |
| aAAaaaAa   | 223.01                          | 223.25                         | -0.11        |
| aAAaaAaa   | 223.07                          | 223.25                         | -0.08        |
| aAaAaaaa   | 222.22                          | 223.24                         | -0.46        |
| aAaaAaaa   | 223.14                          | 223.24                         | -0.05        |
| aAaaaAaa   | 224.22                          | 223.24                         | 0.44         |
| aAaaaaAa   | 224.52                          | 223.24                         | 0.57         |
| aaaAAaaa   | 237.26                          | 223.24                         | 6.09         |
| aaaAaAaa   | 238.23                          | 223.24                         | 6.50         |
| aaaAaaAa   | 238.87                          | 223.24                         | 6.76         |
| aaaaAAaa   | 225.01                          | 223.24                         | 0.79         |
| aaaaAaAa   | 225.37                          | 223.24                         | 0.95         |
| aaaaaAAa   | 226.03                          | 223.24                         | 1.24         |
| aaAAaaaa   | 221.99                          | 223.24                         | -0.56        |
| aaAaAaaa   | 222.77                          | 223.24                         | -0.21        |
| aaAaaAaa   | 223.97                          | 223.24                         | 0.33         |
| aaAaaaaAa  | 224.17                          | 223.24                         | 0.41         |
| aAaAaaaaa  | 236.14                          | 237.13                         | -0.42        |
| aAaaAaaaa  | 236.78                          | 237.13                         | -0.15        |
| aAaaaAaaa  | 237.63                          | 237.13                         | 0.21         |
| aAaaaaAaa  | 238.89                          | 237.13                         | 0.74         |
| aAaaaaaAa  | 238.45                          | 237.13                         | 0.56         |
| aAAaaaaaa  | 236.44                          | 237.13                         | -0.29        |
| aaAAaaaaa  | 236.07                          | 237.13                         | -0.45        |
| aaAaAaaaa  | 236.02                          | 237.13                         | -0.47        |
| aaAaaAaaa  | 237.31                          | 237.13                         | 0.08         |
| aaAaaaAaa  | 237.83                          | 237.13                         | 0.29         |
| aaAaaaaAa  | 238.15                          | 237.13                         | 0.43         |
| aaaAAaaaa  | 236.82                          | 237.13                         | -0.13        |
| aaaAaAaaa  | 237.10                          | 237.13                         | -0.01        |
| aaaAaaAaa  | 238.32                          | 237.13                         | 0.50         |
| aaaAaaaAa  | 238.23                          | 237.13                         | 0.47         |
| aaaaAAaaa  | 238.23                          | 237.13                         | 0.46         |
| aaaaAaAaa  | 238.37                          | 237.13                         | 0.52         |
| aaaaAaaAa  | 238.83                          | 237.13                         | 0.72         |
| aaaaaaAAa  | 240.04                          | 237.13                         | 1.22         |
| aAAaaaaAaa | 251.02                          | 249.09                         | 0.77         |
| aAAaaaaaAa | 250.56                          | 249.09                         | 0.59         |
| aAaAaaaAaa | 250.31                          | 249.09                         | 0.49         |
| aAaAaaaaAa | 250.66                          | 249.09                         | 0.63         |

| Sequence   | Predicted CCS (Å <sup>2</sup> ) | Measured CCS (Å <sup>2</sup> ) | % Difference |
|------------|---------------------------------|--------------------------------|--------------|
| aAaaAaaAaa | 251.27                          | 249.09                         | 0.87         |
| aAaaAaaaAa | 251.00                          | 249.09                         | 0.76         |
| aAaaaAaAaa | 251.57                          | 249.09                         | 0.99         |
| aAaaaAaaAa | 252.08                          | 249.09                         | 1.19         |
| aAaaaaAAaa | 252.36                          | 249.09                         | 1.30         |
| aAaaaaAaAa | 252.08                          | 249.09                         | 1.19         |
| aAaaaaAAa  | 252.58                          | 249.09                         | 1.39         |
| aaAAaaaAaa | 250.24                          | 249.09                         | 0.46         |
| aaAAaaaaAa | 249.98                          | 249.09                         | 0.36         |
| aaAaAaaAaa | 250.51                          | 249.09                         | 0.57         |
| aaAaAaaaAa | 250.13                          | 249.09                         | 0.42         |
| aaAaaAaAaa | 251.41                          | 249.09                         | 0.93         |
| aaAaaAaaAa | 251.39                          | 249.09                         | 0.92         |
| aaAaaaAAaa | 251.92                          | 249.09                         | 1.13         |
| aaAaaaAaAa | 251.45                          | 249.09                         | 0.94         |
| aaAaaaaAAa | 252.17                          | 249.09                         | 1.23         |
| aaaaAAaAaa | 251.77                          | 249.09                         | 1.07         |
| aaaaAAaaAa | 251.54                          | 249.09                         | 0.98         |
| aaaaAaAAaa | 252.12                          | 249.09                         | 1.21         |
| aaaaAaAaAa | 251.70                          | 249.09                         | 1.04         |
| aaaaAaaAAa | 252.48                          | 249.09                         | 1.35         |
| aaaaaAAaAa | 252.44                          | 249.09                         | 1.34         |
| aaaaaAaAAa | 253.13                          | 249.09                         | 1.61         |
| aaaAAaaaAa | 250.36                          | 249.09                         | 0.51         |
| aaaAAaaAaa | 250.79                          | 249.09                         | 0.68         |
| aaaAaAaaAa | 251.21                          | 249.09                         | 0.85         |
| aaaAaAaAaa | 250.99                          | 249.09                         | 0.76         |
| aaaAaaaAAa | 252.99                          | 249.09                         | 1.55         |
| aaaAaaAaAa | 251.68                          | 249.09                         | 1.03         |
| aaaAaaAAaa | 252.44                          | 249.09                         | 1.34         |

CCS Calibration Curve. Below is the calibration curve created for the calculation of experimental CCS measurements on the Waters Synapt G2, operated as described previously. Polymalic acid in negative ion mode was used for calibration<sup>2</sup>. Parameters are as specified above in IM-MS Instrumental Methods.

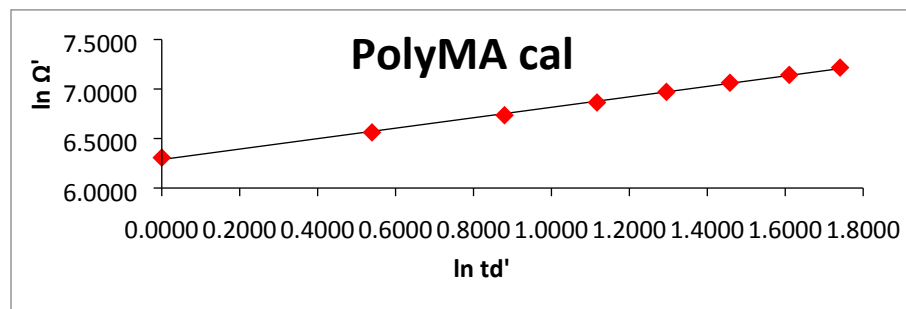



1. G. Paglia, P. Angel, J. P. Williams, K. Richardson, H. J. Olivos, J. W. Thompson, L. Menikarachchi, S. Lai, C. Walsh and A. Moseley, *Analytical chemistry*, 2014, **87**, 1137-1144.
2. J. G. Forsythe, A. S. Petrov, C. A. Walker, S. J. Allen, J. S. Pellissier, M. F. Bush, N. V. Hud and F. M. Fernández, *Analyst*, 2015, **140**, 6853-6861.
